# Supplementary material for: Empowering Incoming Fellows: A Structured Workshop to Enhance Teaching and Professional Skills
Source: Research Square preprint supplement (doi:10.21203/rs.3.rs-7973185/v1), 2026-01-12
Supplement: Supplementary file 1 [file 063572ff337c13f6b7255fa1.docx]

| 1. Which of the following is the BEST example of a SMART goal?  A. “Get better at wilderness medicine research.”  B. “Submit a first-author manuscript on avalanche CPR outcomes using a national EMS/SAR registry by April 1.”  C. “Learn more about ultrasound skills this year.”  D. “Do something with avalanche resuscitation.”  **Correct Answer: B.** |
| --- |
| 2. In the SMART framework, which element ensures a goal aligns with your career aspirations and values?  A. Specific  B. Measurable  C. Relevant  D. Time-bound  **Correct Answer:** **C.** |
| 3. How can you avoid learner disengagement?   1. Chart review while the learner is presenting to improve efficiency. 2. Make jokes about the learner so they feel part of the team. 3. Cut learners off so they don’t waste time in their presentations. 4. Give learners your full attention and create a safe learning environment for them to take risks.   **Correct Answer D.** |
| 4. Choose the correct Microteaching Method:   1. One Minute Preceptor: Commitment, Probe, Reinforce, Guidance, Teach 2. Procedural Model: See one, do one, teach one 3. SPIT Model: Supervise, Precept, Inquire, Teach 4. SNAPPS: Preceptor Driven   **Correct Answer: A.** |
| 5. According to the idea of deep work, what are the benefits of focused, intense work on cognitively demanding tasks free of distraction?   1. Higher levels of productivity in your professional life 2. Generate more high value work efficiently 3. Results in improved skills and job satisfaction 4. All of the above   **Correct Answer: D.** |
| 6. Which of the following leads to distraction and fragmentation of thought impeding successful implementation of deep work?   1. A quiet isolated place 2. Setting up a routine or ritual that you can follow every day 3. Social media 4. Ambitious, yet focused and attainable, goals   **Correct Answer: C.** |
| 7. What are the benefits of a feedback action plan?  A. Demonstrates engagement and growth mindset.   1. Sets clear expectations for both the learner and educator 2. Creates a plan to hold both parties accountable 3. Improves quality and quantity of feedback 4. All the above   **Correct Answer: E.** |
| 8. Which task is AI particularly helpful with during the publication process?   1. Choosing co-authors for your manuscript 2. Identifying appropriate journals for submission 3. Conducting peer review of your manuscript 4. Handling IRB submissions independently   **Correct Answer: B.** |
| 9. What is the most effective way to structure a one-year scholarly timeline during fellowship?  A. Focus on clinical duties first and delay research until the final 3 months B. Begin with manuscript writing, then identify a mentor and research topic C. Start early with project planning, mentorship, and IRB submission, then progress to data and writing  D. Complete all data collection before thinking about publication goals **Correct Answer: C.** |
| 10. As you navigate your career, what should you align your activities toward?  A. Activities that only are grant funded  B. Activities that align with your professional goals  C. Activities that your colleagues are doing  D. Activities that provide scholarship but don’t align with your career goals  **Correct Answer: B.** |

Supplement 3. Knowledge Assessment for the Transition to Fellowship Workshop.
