# Supplementary material for: Empowering Incoming Fellows: A Structured Workshop to Enhance Teaching and Professional Skills
Source: Research Square preprint supplement (doi:10.21203/rs.3.rs-7973185/v1), 2026-01-12
Supplement: Supplementary file 2 [file 3a5d4a6b23ea6f7e7a5f7fa4.docx]

| **Presentation Title**  (Educational Delivery Method) | **Learning Objectives** |
| --- | --- |
| **Trail Markers:**  **Setting SMART Goals for Purposeful Fellowship & On-Shift Teaching**  (Lecture - 25 minutes) | 1. Describe the importance of setting SMART goals to guide purposeful growth during fellowship. 2. Apply the SMART framework to create specific, measurable, achievable, relevant, and time-bound goals in clinical, scholarly, and personal domains. 3. Practice transforming vague intentions into actionable SMART goals for both long-term projects and daily clinical teaching. 4. Identify strategies to track progress, adapt goals, and use feedback for continuous professional development throughout fellowship. |
| **Maximize Learning:**  **Supervising Medical Students and Residents and Microteaching Methods**  (Workshop - 50 minutes) | 1. Develop techniques to build a safe learning environment. 2. Implement new strategies to meet new team members and establish goals. 3. Create an educational approach to various content topics to improve conference didactics. 4. Select and apply the appropriate microteaching method for your clinical setting. |
| **Finding Balance:**  **Time Management Skills for Success**  (Lecture - 25 minutes) | 1. Understand the concepts of deep and shallow work 2. Recognize habits and practices that lead to distraction from completing work 3. Implement habits that help focus available time to complete a task |
| **The Feedback Sandwich:**  **Giving and Receiving Feedback from the Middle**  (Workshop - 50 minutes) | 1. Ask clarifying questions to better understand expectations for each new rotation. 2. Create SMART goals with faculty supervisors and medical students and residents at the start of each shift, clinic day, or rotation block. 3. Develop an actionable feedback plan in conjunction with the supervising faculty and medical students and residents. 4. Understand the common goal of feedback is to help fellows, residents, and medical students become better physicians and take excellent care of patients. |
| **Maximizing Scholarship:**  **Getting Published as a Fellow**  (Lecture - 25 minutes) | 1. Provide practical strategies to maximize scholarly productivity and get published.​ 2. Leveraging AI tools to enhance productivity in research and writing ​ 3. Understand the importance of aligning projects with personal interests and career goals.​ 4. Develop effective writing skills for successful publication.​ 5. Navigate the submission process, including responding to peer review |
| **You Are Not Alone:**  **Asking For Help as a New Attending**  (Workshop - 50 minutes) | 1. Describe the stigma associated with asking for help at the Attending level. 2. Generate strategies to mitigate the pressure of academic overload. 3. Develop an approach to precepting medical students and residents while reconciling clinical confidence. 4. Identify when and how to ask for professional mental health care. |

Supplement 1. Presentation titles, format, and learning objectives for the Transition to Fellowship Workshop.
