# Supplementary material for: Empowering Incoming Fellows: A Structured Workshop to Enhance Teaching and Professional Skills
Source: Research Square preprint supplement (doi:10.21203/rs.3.rs-7973185/v1), 2026-01-12
Supplement: Supplementary file 3 [file 6c219478b19e731475e2b778.docx]

| *On a scale of 1 to 5, how confident do you feel in your ability to...* |
| --- |
| Set and pursue personal and professional goals. |
| Effectively supervise junior residents and medical students. |
| Provide constructive feedback to junior residents and medical students. |
| Receive and apply feedback from supervisors. |
| Maintain a healthy balance between personal and professional responsibilities. |
| Design and complete scholarly projects. |
| Seek support and guidance when needed. |

Supplement 2. Pre- and Post-Transition to Fellowship Confidence Survey (1 = Not confident at all, 5 = Very confident).
